# Supplementary material for: High expression of microRNA-126 relates to favorable prognosis for colon cancer patients
Source: PubMed Central journal article supplement (PMC8100289; doi:10.1038/s41598-021-87985-3), 2021-05-05
Supplement: 41598_2021_87985_MOESM2_ESM.pdf [file 41598_2021_87985_MOESM2_ESM.pdf]

# High expression of microRNA-126 Relates to Favorable Prognosis for Colon Cancer Patients

Hallgeir Selven<sup>1,2\*</sup>

Lill-Tove Rasmussen Busund<sup>3,4</sup>

Sigve Andersen<sup>1,2</sup>

Roy M. Bremnes<sup>1,2</sup>

Thomas Karsten Kilvær<sup>1,2</sup>

1 Department of Oncology, University Hospital of North Norway, Tromsø, Norway

2 Department of Clinical Medicine, UiT The Arctic University of Norway, Tromsø, Norway

3 Department of Medical Biology, UiT The Arctic University of Norway, Tromsø, Norway

4 Department of Clinical Pathology, University Hospital of North Norway, Tromsø, Norway

Corresponding author and reprints:

Hallgeir Selven

Department of Oncology, University Hospital of North Norway

9038 Tromsø, Norway

Telephone: +47 776 26 765/+47 976 83 966

Fax: +47 776 26 779

**E-mail:** [hallgeir.selven@uit.no](mailto:hallgeir.selven@uit.no)

S1 Figure

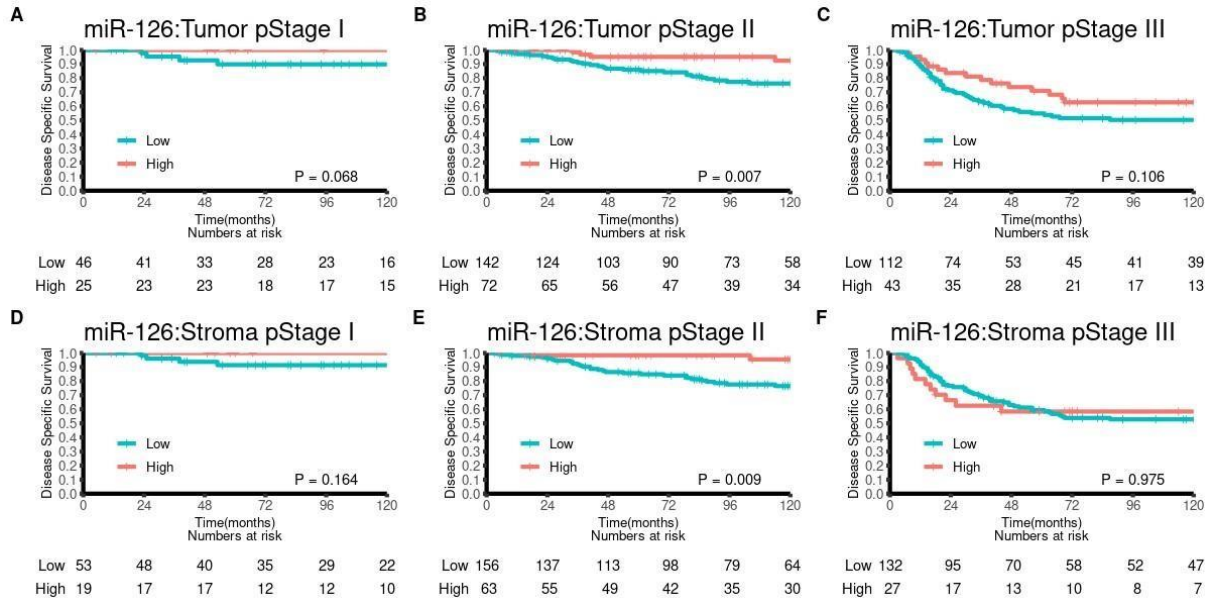

S2 Figure

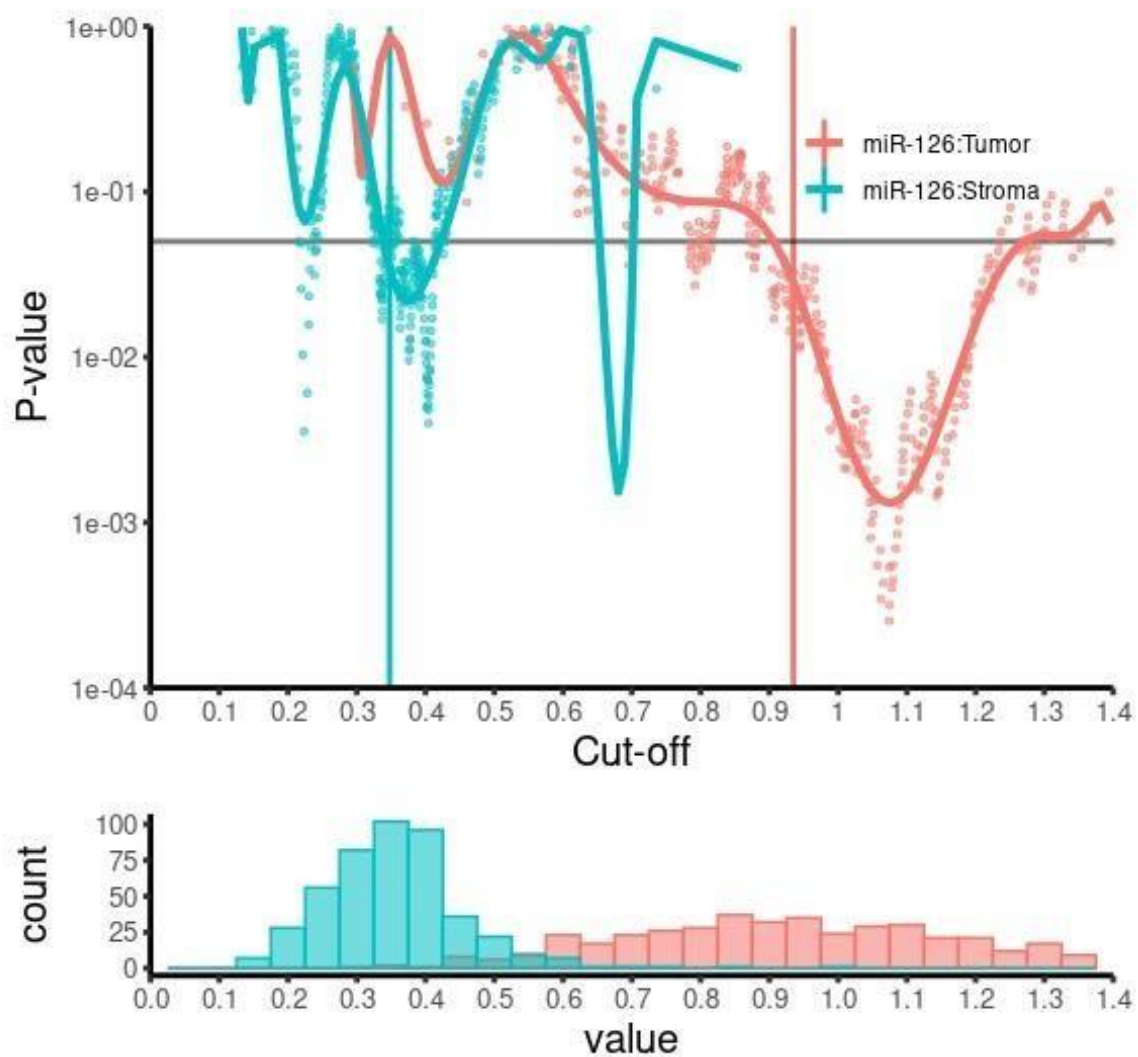

```

import qupath.lib.objects.PathAnnotationObject
import qupath.lib.objects.TMACoreObject
import qupath.lib.objects.hierarchy.PathObjectHierarchy

//Preprocessing
setImageType('BRIGHTFIELD_OTHER');
setColorDeconvolutionStains('{"Name" : "H-DAB default", "Stain 1" : "miR-126",
"Values 1" : "0.65123 0.70124 0.2901 ", "Stain 2" : "R", "Values 2" : "0.26896
0.56792 0.7779 ", "Background" : " 255 255 255 "}');
selectTMACores();
runPlugin('qupath.imagej.detect.tissue.SimpleTissueDetection2', '{"threshold": 252,
"requestedPixelSizeMicrons": 1.0, "minAreaMicrons": 500.0, "maxHoleAreaMicrons":
500.0, "darkBackground": false, "smoothImage": true, "medianCleanup": true,
"dilateBoundaries": false, "smoothCoordinates": true, "excludeOnBoundary": false,
"singleAnnotation": true}');

//Area identification
selectAnnotations();
//Superpixels can be used as an alternative to conventional tiles
runPlugin('qupath.lib.algorithms.TilerPlugin', '{"tileSizeMicrons": 10.0,
"trimToROI": true, "makeAnnotations": false, "removeParentAnnotation": false}');
//runPlugin('qupath.imagej.superpixels.SLICSuperpixelsPlugin', '{"sigmaMicrons":
2.0, "spacingMicrons": 10.0, "maxIterations": 10, "regularization": 0.25,
"adaptRegularization": true, "useDeconvolved": true}');
selectDetections(); runPlugin('qupath.lib.algorithms.IntensityFeaturesPlugin',
'{"pixelSizeMicrons": 2.0, "region": "ROI", "tileSizeMicrons": 25.0, "colorOD":
true, "colorStain1":
true, "colorStain2": true, "colorStain3": false, "colorRed": true,
"colorGreen": false, "colorBlue": true, "colorHue": true, "colorSaturation":
true, "colorBrightness": true, "doMean": true, "doStdDev": true, "doMinMax":
true, "doMedian": true, "doHaralick": true, "haralickDistance": 1,
"haralickBins": 32}');
selectAnnotations();
runPlugin('qupath.lib.plugins.objects.SmoothFeaturesPlugin', '{"fwhmMicrons": 25.0,
"smoothWithinClasses": false, "useLegacyNames": false}');
runPlugin('qupath.lib.plugins.objects.SmoothFeaturesPlugin', '{"fwhmMicrons": 75.0,
"smoothWithinClasses": false, "useLegacyNames": false}');

//Tidy the annotations
selectAnnotations();
def selected = getSelectedObjects()
removeObjects(selected, true)

//Run classifier and create area annotations
runClassifier('path_to_your_classifier')
selectTMACores();
runPlugin('qupath.lib.analysis.objects.TileClassificationsToAnnotationsPlugin',
'{"pathClass": "All classes", "deleteTiles": true, "clearAnnotations": false,
"splitAnnotations": false}'); selectAnnotations();
runPlugin('qupath.lib.algorithms.IntensityFeaturesPlugin', '{"pixelSizeMicrons":
2.0, "region": "ROI", "tileSizeMicrons": 25.0, "colorOD": false, "colorStain1":
true, "colorStain2": false, "colorStain3": false, "colorRed": false,
"colorGreen": false, "colorBlue": false, "colorHue": false, "colorSaturation":
false, "colorBrightness": false, "doMean": true, "doStdDev": true, "doMinMax":

```

```

true,      "doMedian": true,      "doHaralick": false,      "haralickDistance": 1,
"haralickBins": 32}');

//Add measurements from area annotations to the TMACoreObject
def addMeasurements(PathObjectHierarchy hierarchy, TMACoreObject core, pixelWidth,
pixelHeight) {
    def annotations = hierarchy.getDescendantObjects(core, null,
PathAnnotationObject)

    //Check if core has annotation
if (annotations.size() > 0) {

        //check if each annotation is of interest, and if so, keep track of the
positive and negative cells within      annotations.each { annotation ->
annotationName = annotation.getPathClass().getName()
        if (annotation.getROI().getScaledArea(pixelWidth, pixelHeight) >
MIN_AREA_MICRONS) {
            def measures = annotation.getMeasurementList()
measures.each {
                def measureName = it.getName().tokenize()[5,6].join()
def measure = it.getValue()
                core.getMeasurementList().putMeasurement("${annotationName} $
{measureName}", measure)
            }
        }
    }else{
        core.setMissing(true)
    }
}
MIN_AREA_MICRONS = 40000
def server = getCurrentImageData().getServer()
double pixelWidth = server.getPixelWidthMicrons()
double pixelHeight = server.getPixelHeightMicrons()
def hierarchy = getCurrentHierarchy()
def cores = hierarchy.getTMAGrid().getTMACoreList()
cores.each {
    addMeasurements(hierarchy, it, pixelWidth, pixelHeight)
}
fireHierarchyUpdate()
println("Finished")

```
